# Supplementary material for: Self-reported exposure of Indonesian adolescents to online and offline tobacco advertising, promotion and sponsorship (TAPS)
Source: HighWire-hosted journal article supplement (doi:10.1136/tobaccocontrol-2020-056080), 2021-02-19
Supplement: tobaccocontrol-2020-056080supp001_data_supplement.pdf [file tobaccocontrol-2020-056080supp001_data_supplement.pdf]

## SUPPLEMENTARY TABLE

**Supplementary Table 1.** Sensitivity analysis of percentage of young social media users who **were often exposed** to TAPS on social media, stratified by city.

|                  | Total users | % exposed | Cities |           |           |           |          |           |        | P-value <sup>a</sup> | Variance (SD) <sup>b</sup> |             |
|------------------|-------------|-----------|--------|-----------|-----------|-----------|----------|-----------|--------|----------------------|----------------------------|-------------|
|                  |             |           | Malang | Pekanbaru | Pontianak | Gorontalo | Denpasar | Samarinda | Cimahi |                      | City                       | School      |
| <i>Instagram</i> | 2,580       | 32.4      | 37.2   | 30.2      | 21.8      | 33.6      | 38.9     | 28.1      | 44.4   | 0.47                 | 0.53 (0.19)                | 0.39 (0.12) |
| <i>Facebook</i>  | 2,613       | 28.9      | 34.3   | 18.9      | 30.2      | 30.3      | 20.6     | 35.1      | 28.9   | 0.83                 | 0.24 (0.39)                | 0.80 (0.18) |
| <i>YouTube</i>   | 2,559       | 26.1      | 26.8   | 19.4      | 24.3      | 35.5      | 18.2     | 28.3      | 27.2   | 0.63                 | 0.19 (0.16)                | 0.39 (0.11) |
| <i>Twitter</i>   | 2,159       | 9.59      | 10.0   | 8.0       | 6.4       | 15.7      | 8.5      | 7.0       | 12.4   | 0.88                 | 0.24 (0.18)                | 0.41 (0.14) |

<sup>a</sup> P-value was derived from the Wald test in age-adjusted multilevel logistic regression model with no exposure vs often exposure through internet, outdoor advertising, broadcast media, and tobacco industry sponsorship as the outcomes, and cities as independent variable.

<sup>b</sup> Presents the variance in exposure between schools and cities, respectively.

**Supplementary Table 2.** Sensitivity analysis of percentage of young social media users who **were often exposed** to TAPS on social media stratified by individual characteristics.

|                  | Age in years |         |         | P-value <sup>a</sup> | Gender |      | P-value <sup>a,b</sup> | Smoking status |        | P-value <sup>a,b</sup> |
|------------------|--------------|---------|---------|----------------------|--------|------|------------------------|----------------|--------|------------------------|
|                  | 13 - 14      | 15 - 16 | 17 - 18 |                      | Girls  | Boys |                        | Non-smoker     | Smoker |                        |
| Internet         |              |         |         |                      |        |      |                        |                |        |                        |
| <i>Instagram</i> | 26.5         | 35.0    | 35.9    | 0.20                 | 31.9   | 32.9 | 0.46                   | 31.4           | 36.6   | 0.33                   |
| <i>Facebook</i>  | 25.1         | 32.5    | 28.9    | 0.01                 | 26.5   | 31.5 | 0.03                   | 27.7           | 34.2   | 0.56                   |
| <i>YouTube</i>   | 22.9         | 29.3    | 31.1    | 0.22                 | 28.7   | 26.4 | < 0.01                 | 27.4           | 28.6   | < 0.01                 |
| <i>Twitter</i>   | 7.0          | 11.4    | 10.1    | 0.02                 | 6.6    | 12.8 | < 0.01                 | 8.3            | 15.0   | < 0.01                 |

<sup>a</sup> P-value was derived from the Wald test in multilevel logistic regression model with no exposure vs often exposure.

<sup>b</sup> Models comparing boys and girls, and smokers and non-smokers were adjusted for age.

<sup>c</sup> Responses were only 'no' and 'yes'.
